P1966

## Impact of coronary artery calcification on long-term outcomes after implantation of first and second-generation drug-eluting stents: a patient-level analysis of 18 randomized trials

P. Guedeney<sup>1</sup>, B. Claessen<sup>2</sup>, R. Mehran<sup>2</sup>, G. Mintz<sup>3</sup>, M. Liu<sup>3</sup>, S. Sorrentino<sup>2</sup>, S. Farhan<sup>2</sup>, M.B. Leon<sup>3</sup>, P. Serruys<sup>4</sup>, P.C. Smits<sup>5</sup>, C. Von Birgelen<sup>6</sup>, B. Redfors<sup>3</sup>, M.V. Madhavan<sup>3</sup>, O. Ben-Yehuda<sup>3</sup>, G.W. Stone<sup>3</sup>

<sup>1</sup>Hospital Pitie-Salpetriere, Paris, France; <sup>2</sup>The Zena and Michael A. Wiener Cardiovascular Institute, New York, United States of America; <sup>3</sup>Cardiovascular Research Foundation, Clinical trials center, New York, United States of America; <sup>4</sup>Imperial College London, Technology and medicine, London, United Kingdom; <sup>5</sup>Maasstad Ziekenhuis, Cardiology, Rotterdam, Netherlands (The); <sup>6</sup>Medical Spectrum Twente, Cardiology, Enschede, Netherlands (The)

**Funding Acknowledgement:** This investigator-sponsored study was funded by Abbott Vascular.

**Background:** Available data on the long-term impact of coronary artery calcification (CAC) after percutaneous coronary intervention (PCI) with drug-eluting stents (DES) are limited.

**Purpose:** We evaluated the long-term impact of CAC on outcomes after PCI and the respective performance of first- and second-generation DES.

**Methods:** We pooled patient-level data from 18 randomized trials evaluating DES categorized according to the presence of angiographic core lab-confirmed moderate or severe CAC in any target lesion. Outcome measures of interest were the patient-oriented composite endpoint (POCE; death, myocardial infarction [MI], or any revascularization), the device-oriented composite endpoint of target lesion failure (TLF; cardiac death, target vessel MI or ischemia-driven target lesion revascularization), and definite or probable stent thrombosis (ST). Multivariable Cox proportional

regression with study as a random effect was used to assess 5-year outcomes.

**Results:** A total of 19,833 patients were included. Moderate or severe CAC was present in 6211 (31.3%) patients and associated with increased 5-year risk of the POCE (adjHR 1.12, 95% CI 1.05–1.20,  $p < 0.001$ ), TLF (adjHR 1.21, 95% CI 1.09–1.35,  $p < 0.001$ ), and a trend for greater ST (adjHR 1.24, 95% CI 0.99–1.54,  $p = 0.06$ ). In patients with CAC, second-generation DES were associated with a reduction in the 5-year risk of TLF and ST, and a trend for reduced POCE compared with first-generation DES (Table).

**Conclusion:** In this large-scale study, target lesion moderate or severe CAC was associated with adverse patient- and device-related outcomes at 5 years, risks that were reduced but not eliminated with second-generation DES.

|                                       | No or Mild CAC                 |                               |                                                 | Moderate or Severe CAC         |                               |                                                 | p Value for Interaction |
|---------------------------------------|--------------------------------|-------------------------------|-------------------------------------------------|--------------------------------|-------------------------------|-------------------------------------------------|-------------------------|
|                                       | Second-Generation DES (n=8157) | First-Generation DES (n=5465) | Adjusted Hazard Ratio (95% Confidence Interval) | Second-Generation DES (n=3803) | First-Generation DES (n=2408) | Adjusted Hazard Ratio (95% Confidence Interval) |                         |
| Patients-oriented composite endpoints | 1527 (22.3%)                   | 1431 (29.6%)                  | 0.87 (0.79-0.97)                                | 869 (27.3%)                    | 724 (35.3%)                   | 0.88 (0.78-1.00)                                | 0.85                    |
| Target lesion failure                 | 704 (10.4%)                    | 462 (15.6%)                   | 0.69 (0.60-0.80)                                | 470 (14.8%)                    | 247 (19.8%)                   | 0.73 (0.61-0.87)                                | 0.61                    |
| All-cause death                       | 402 (6.8%)                     | 383 (8.9%)                    | 0.81 (0.69-0.94)                                | 287 (10.2%)                    | 224 (12.4%)                   | 0.86 (0.71-1.04)                                | 0.77                    |
| Myocardial infarction                 | 282 (4.0%)                     | 367 (7.6%)                    | 0.53 (0.43-0.64)                                | 195 (6.0%)                     | 186 (8.8%)                    | 0.61 (0.48-0.77)                                | 0.29                    |
| Target vessel                         | 221 (3.2%)                     | 172 (5.7%)                    | 0.57 (0.43-0.76)                                | 157 (4.7%)                     | 101 (8.0%)                    | 0.57 (0.43-0.76)                                | 0.95                    |
| Any revascularization                 | 1062 (18.7%)                   | 993 (20.5%)                   | 0.96 (0.85-1.08)                                | 538 (20.5%)                    | 499 (24.3%)                   | 0.91 (0.78-1.05)                                | 0.50                    |
| Ischemia-driven TLR                   | 426 (6.1%)                     | 482 (9.9%)                    | 0.65 (0.54-0.77)                                | 258 (8.0%)                     | 237 (11.6%)                   | 0.69 (0.56-0.86)                                | 0.59                    |
| Probable or definite stent thrombosis | 79 (1.2%)                      | 157 (3.2%)                    | 0.47 (0.34-0.67)                                | 63 (2.1%)                      | 89 (4.1%)                     | 0.60 (0.41-0.89)                                | 0.27                    |

Data are expressed as n (Kaplan-Meier estimated rate). Covariates for the multivariable models: age; sex; current smoker; insulin-treated diabetes mellitus; non-insulin treated diabetes mellitus; hypertension; hyperlipidemia; prior percutaneous coronary intervention; prior coronary artery bypass graft surgery; prior myocardial infarction; percutaneous coronary intervention indication: number of treated lesions (>1 lesion treated versus one treated lesion) and total stent length. CAC = coronary artery calcification; DES = drug-eluting stents; TLR = target lesion revascularization.
